# Supplementary material for: What does “just” mean in just energy transitions? Different perspectives between EU institutional debates and scientific literature
Source: Frontiers journal article supplement (doi:10.3389/fpos.2025.1572855), 2025-05-26
Supplement: Data_Sheet_1.pdf [file Data_Sheet_1.pdf]

## **Parliamentary debates**

### **Sustainable investment plan, just transition fund and Roadmap on Social Europe – 14/01/2020**

Interventions by:

Frans Timmermans, Executive Vice-President of the Commission.

Valdis Dombrovskis, Executive Vice-President of the Commission.

Siegfried Mureşan, on behalf of the PPE Group.

Iratxe García Pérez, on behalf of the S&D Group.

Dragoş Pîslaru, on behalf of the Renew Group.

Niklas Nienaaß, on behalf of the Verts/ALE Group.

Gianantonio Da Re, on behalf of the ID Group.

Johan Van Overtveldt, on behalf of the ECR Group.

Younous Omarjee, on behalf of the GUE/NGL Group.

Rosa D'Amato (NI).

Andrey Novakov (PPE).

Biljana Borzan (S&D).

Sylvie Brunet (Renew).

Katrin Langensiepen (Verts/ALE).

Laura Huhtasaari (ID).

Elżbieta Rafalska (ECR).

Piernicola Pedicini (NI).

Markus Ferber (PPE).

Helène Fritzson (S&D).

Bas Eickhout (Verts/ALE).

Ivan David (ID).

Evžen Tošenovský (ECR).

Robert Rowland (NI).

Niklas Nienaaß (Verts/ALE)

Robert Rowland (NI)

Dennis Radtke (PPE).

Miriam Dalli (S&D).

Clotilde Armand (Renew).

Ville Niinistö (Verts/ALE).

Guido Reil (ID).

Grzegorz Tobiszowski (ECR).

Kokkalis (GUE/NGL).

Grzegorz Tobiszowski (ECR).

José Gusmão (GUE/NGL).

José Manuel Fernandes (PPE).

Simona Bonafè (S&D).

Jordi Cañas (Renew).

Paolo Borchia (ID).

Anna Zalewska (ECR).

Peter Liese (PPE).

Dan Nica (S&D).

Pascal Canfin (Renew).

Jadwiga Wiśniewska (ECR).

Pascal Canfin (Renew).

Rasmus Andresen (Verts/ALE).

Izabela-Helena Kloc (ECR).

Maria da Graça Carvalho (PPE).

Jonás Fernández (S&D).

Moritz Körner (Renew).

Petra De Sutter (Verts/ALE).

Jadwiga Wiśniewska (ECR).

Isabel Benjumea Benjumea (PPE).

Agnes Jongerius (S&D).

Jan Huitema (Renew).

Caroline Roose (Verts/ALE).

Cristian-Silviu Buşoi (PPE).

Constanze Krehl (S&D).

Mauri Pekkarinen (Renew).

Michael Bloss (Verts/ALE).

Adam Jarubas (PPE).

Margarida Marques (S&D).

Pär Holmgren (Verts/ALE).

Jerzy Buzek (PPE).

Mounir Satouri (Verts/ALE).

Franc Bogovič (PPE).

Othmar Karas (EPP).

Herbert Dorfmann (PPE).

Janusz Lewandowski (PPE).

The President.

Maria Spyrali (PPE).

Edina Tóth (PPE).  
Tomislav Sokol (PPE).  
Lídia Pereira (PPE).  
Stelios Kympouropoulos (PPE).  
Julie Ward (S&D).  
The President.  
Susana Solís Pérez (Renew).  
Bogdan Rzońca (ECR).  
Marc Botenga (GUE/NGL).  
Antonius Manders (PPE).  
Maria Grapini (S&D)  
The President  
Frans Timmermans, Executive Vice-President of the Commission.  
Valdis Dombrovskis, Executive Vice-President of the Commission.  
The President.

**Written statements (Article 171)**

Marek Belka (S&D), in writing.  
Tudor Ciuhodaru (S&D), in writing.  
Andor Deli (PPE), in writing.  
Cindy Franssen (PPE), in writing.  
Eider Gardiazabal Rubial (S&D), in writing.  
Nicolás González Casares (S&D), in writing.  
András Gyürk (PPE), in writing.

**Just Transition Fund, 17/05/2021**

Interventions by:

Manolis Kefalogiannis.  
Siegfried Mureşan, rapporteur for the opinion of the Committee on Budgets.  
Henrike Hahn, author of the opinion of the consulting Committee on Economic and Monetary Affairs.  
Mounir Satouri, rapporteur for the opinion of the Committee on Employment and Social Affairs.  
Jerzy Buzek, author of the draft opinion of the Committee on Industry, Research and Energy.  
Nicolas Schmit, Member of the Commission.  
Vlad Gheorghe, rapporteur for the opinion of the Committee on Transport and Tourism.  
Isabel Carvalhais, rapporteur for the opinion of the Committee on Agriculture and Rural Development.  
Andrey Novakov, on behalf of the EPP Group.  
Pedro Marques, on behalf of the S&D Group.  
Ondřej Knotek, on behalf of the Renew Group.  
Francesca Donato, on behalf of the ID group.  
Niklas Nienaaß, on behalf of the Verts/ALE Group.  
Raffaele Fitto, on behalf of the ECR group.  
Martina Michels, on behalf of The Left faction.  
Tomislav Sokol (EPP)  
Rovana Plumb (S&D).  
Susana Solís Pérez (Renew).  
Mathilde Androuët (ID).  
François Alfonsi (Verts/ALE).  
Anna Zalewska (ECR).  
Younous Omarjee (The Left).  
Salvatore De Meo (PPE).  
Tonino Picula (S&D).  
Vlad-Marius Botoş (Renew).  
Elena Lizzi (ID).  
Bogdan Rzońca (ECR).  
Πέτρος Κόκκαλης (The Left).  
Λευτέρης Χριστοφόρου (PPE).  
Cristina Maestre Martín de Almagro (S&D). –  
Maximilian Krah (ID).  
Hannes Heide (S&D).  
Josianne Cutajar (S&D).  
Vera Tax (S&D).  
Manuel Pizarro (S&D).  
Nicolas Schmit, Member of the Commission.  
Daniel Buda (PPE), in writing.  
Andrea Caroppo (PPE), in writing.  
Robert Hajšel (S&D), in writing.  
Elżbieta Kruk (ECR), in writing.  
Alin Mituţa (Renew), in writing.  
Dan-Ştefan Motreanu (PPE), in writing.  
Mihai Tudose (S&D), in writing.

## **Public Sector Loan Facility under the Just Transition Mechanism, 24/06/2021**

Interventions by:

Johan Van Overtveldt, Rapporteur.

Henrike Hahn, Rapporteur.

Janusz Wojciechowski, Member of the Commission.

Josianne Cutajar, Rapporteur for the opinion of the Committee on Regional Development.

José Manuel Fernandes, on behalf of the EPP Group.

Marek Belka, on behalf of the S&D Group.

Nicolae Ștefănuță, on behalf of the Renew Group.

Hélène Laporte, on behalf of the ID Group.

Bogdan Rzońca, on behalf of the ECR Group.

José Gusmão, on behalf of The Left Group.

Ivan Vilibor Sinčić (NI).

Frances Fitzgerald (PPE).

Eero Heinäluoma (S&D).

Linea Sogaard-Lidell (Renew).

Joachim Kuhs (ID).

Andżelika Anna Możdżanowska (ECR).

Krzysztof Hetman (PPE).

Jonás Fernández (S&D).

Anna Zalewska (ECR).

Georgios Kyrtos (PPE).

Janusz Wojciechowski, Member of the Commission.

Gunnar Beck (ID), in writing.

Pedro Marques (S&D), in writing.

## **Statements**

Statement by Commissioner Ferreira at the press conference on the European Green Deal Investment Plan and Just Transition Mechanism. Strasbourg, 14 January 2020

Statement by Commissioner Hahn at the press conference on the European Green Deal Investment Plan and Just Transition Mechanism. Strasbourg, 14 January 2020

Plenary remarks by Executive Vice-Presidents Timmermans and Dombrovskis on the European Green Deal Investment Plan and the Just Transition Mechanism. Strasbourg, 14 January 2020

Keynote speech by EVP Timmermans at the Just Transition Platform Launch Event. Brussels, 29 June 2020

Keynote speech by Commissioner Ferreira at the Just Transition Platform Launch Event. Brussels, 29 June 2020

Keynote speech by Commissioner Simson at the Just Transition Platform Launch Event. Brussels, 29 June 2020

Opening session of the Just Transition Platform - Joint session with Commissioner Simson, 26 April 2021, 27 April 2021

Keynote speech by Commissioner Elisa Ferreira at the opening of the 6th Just Transition Platform conference. Brussels, 24 October 2022

Keynote speech by Commissioner Elisa Ferreira at the Just Transition Fund launch event - Groningen, The Netherlands. Brussels, 20 February 2023

Opening speech by Commissioner Elisa Ferreira at the 7th Just Transition Platform Conference: "JTF hands on: roundtable discussion". Brussels, 25 April 2023

Keynote speech by Commissioner Simson for the session on the international dimension of a just transition at the 7th Just Transition Platform Conference. Brussels, 26 April 2023

Keynote speech by Commissioner Elisa Ferreira (video message) for the Coal Regions in Transition Annual Political Dialogue, Karlovy Vary – Czechia. Online, 27 June 2023
